# Supplementary material
Source: PubMed Central journal article supplement (PMC3510679)
Supplement: NIHMS421977-supplement-Supplemental_Tables.pdf [file NIHMS421977-supplement-Supplemental_Tables.pdf]

**Table S1.** List of putative immune genes induced by oral administration of bacterial elicitors identified using microarray analysis.

| Affymetrix ID        | Gene ID    | Name       | Function                          | Fold Induction<br>( <i>E. coli</i><br>/Cont.) |
|----------------------|------------|------------|-----------------------------------|-----------------------------------------------|
| Ag.2R.258.1_a_at     | AGAP004317 | CLIP-C2    | Clip-Domain Serine Protease       | 5.89                                          |
| Ag.X.8.1_a_at        | AGAP000693 | Cecropin-1 | Antimicrobial peptide             | 1.52                                          |
| Ag.2L.130.0_CDS_s_at | AGAP006342 | PGRP-S3    | Peptidoglycan recognition protein | 5.09                                          |
| Ag.2L.139.0_CDS_at   | AGAP006747 | Rel-2      | Transcription factor IMD pathway  | 2.69                                          |
| Ag.3L.246.0_CDS_at   | AGAP010690 | NKRF-like  | NF-kappa-B-repressing factor-like | 1.59                                          |
| Ag.3R.647.0_UTR_at   | AGAP009978 | DUOX       | Dual oxidase                      | 2.48                                          |
| Ag.X.264.0_CDS_at    | AGAP000999 | TOLL5A     | Toll-like receptor                | 6.80                                          |
| Ag.2L.29.0_CDS_a_at  | AGAP007347 | Lysozyme   | Lysozyme                          | 4.58                                          |
| Ag.X.20.0_CDS_at     | AGAP000536 | PGRP-S1    | Peptidoglycan recognition protein | 2.13                                          |
| Ag.2R.65.0_CDS_a_at  | AGAP001212 | PGRP-LB    | Peptidoglycan recognition protein | 2.32                                          |
| Ag.2R.1767.0_CDS_at  | AGAP004036 | HPx7       | Heme Peroxidase                   | 21.1                                          |

**Note:** The complete data set for this microarray experiment has been submitted to the NCBI Gene Expression Omnibus (GEO) database.

**Table S2.** Name, gene ID, and nucleotide sequence of primers used to determine mRNA expression levels using quantitative RT-PCR.

| <b>Name</b> | <b>Gene ID</b> | <b>Forward Primer (5'-3')</b> | <b>Reverse Primer (5'-3')</b> |
|-------------|----------------|-------------------------------|-------------------------------|
| IMPer       | AGAP013327-RA  | GGGTGCTGTGTGACAATACG          | CCATCGCGTTAAATTCACCT          |
| Cecropin1   | AGAP000693-RA  | AGACCAACCAACCACCAAAC          | TCTTTCCCAGCTTCTTCAGC          |
| PGRP-S3     | AGAP006342-RA  | AACTTCCTGGTCGGTGAGAA          | GTTGGTGAACGTGCCAATC           |
| PGRP-LB     | AGAP001212-RA  | TACGTTGGCAAACAGCTGAC          | ATGCGGGCATTGAGTAAAC           |
| HPX8        | AGAP004038-RA  | ATGGAGCGTTTTTGATCCAG          | TGATCCATCAGCGAGAAGAG          |
| DUOX        | AGAP009978-RA  | CGAGCACAAGAACCATCTCA          | GCTTAGCACCTTGCAATCC           |
| NOS         | AGAP008255-RA  | GCTCGAACTATCTGGCCAAC          | CCACTCTTGCCAGAACGAAC          |
